# Supplementary material for: Genome-Wide Identification and Expression Analyses of the Chitinase Gene Family in Response to White Mold and Drought Stress in Soybean (Glycine max)
Source: MDPI journal article supplement (doi:10.3390/life12091340), 2022-08-29
Supplement: s1 [file s1]

**Table S1:** List of primers used in the qRT-PCR analysis of the selected chitinase genes of soybean

| GeneID          | Chitinase Name     | Fprimer                 | Rprimer                 |
|-----------------|--------------------|-------------------------|-------------------------|
| Glyma.01g160100 | Gm_chitinaseI-1    | ACACTATCTTCGCCTTTATCGT  | CCCCTCACAAATTTGATCGTTT  |
| Glyma.02g042500 | Gm_chitinaseI-2    | CAGGATAATCGGGTCCAAGATC  | GTTACAATCCAAGTTGTCTCCG  |
| Glyma.10g138400 | Gm_chitinaseII-4   | GACAAAGTTACAAAGGCAGAGG  | GGCACATATTTTCCAACCATCA  |
| Glyma.19g221800 | Gm_chitinaseII-7   | GCTTTGCTCTATTGCTCTTCTC  | CATGCAGTGTCTATCTTTGTGAA |
| Glyma.18g120700 | Gm_chitinaseIII-14 | TGTCATGGACTTCTAACCTTGC  | ACATTCTCGGTAACAAACAGGA  |
| Glyma.20g164600 | Gm_chitinaseIII-18 | TTGTAAGTTCTTGGAAGCGTTG  | CCGTTCTGGACATCAAAGAATC  |
| Glyma.11g124500 | Gm_chitinaseIV-1   | TACTGTTTCAGGCTCGTGTTAAT | TGGATGCACAATATCGATGGTA  |
| Glyma.13g346700 | Gm_chitinaseIV-3   | GGCAAGAACTTTTACTCACGAG  | CATGTTAGTTGAATCGGACCAC  |
| Glyma.15g206800 | Gm_chitinaseV-3    | GAAAAGACGTAGCCAACAACCTT | CGGTGCAAAGAGTCCATTTTAA  |
| Glyma.17g103500 | Gm_chitinaseV-5    | GCAATGCCTTCATTCAGCATAT  | GACTGTTACGCAAAAGGATGAG  |
